# Supplementary material for: Spontaneously grown Ni(OH)2on iron oxide nanoparticles with enhanced energy storage performance for electrodes of asymmetric supercapacitors
Source: Royal Society of Chemistry journal article supplement (doi:10.1039/c7ra09119b), 2017-01-01
Supplement: c7ra09119b1.pdf [file c7ra09119b1.pdf]

## Supporting Information

# Spontaneously Grown Ni(OH)<sub>2</sub> on Iron Oxide nanoparticles with Enhanced Energy Storage Performance for Electrode of Asymmetric Supercapacitors

Yue Wang,<sup>a,b</sup> Xianfeng Zhang,<sup>a</sup> Xin Li,<sup>a</sup> Yang Liu,<sup>a</sup> Xiaoping Wang,<sup>c</sup> Xi Liu,<sup>c</sup> Jian Xu,<sup>c</sup>  
Yongwang Li,<sup>c</sup> Yongguang Liu,<sup>a</sup> Hang Wei,<sup>a</sup> Peng Jiang,<sup>a,b\*</sup> and Minghui Liang<sup>a,\*</sup>

<sup>a</sup>*CAS Center for Excellence in Nanoscience, Key Laboratory of Nanosystem and Hierarchical  
Fabrication, National Center for Nanoscience and Technology (NCNST), Beijing 100190, P. R.  
China.*

<sup>b</sup>*University of Chinese Academy of Sciences, Beijing 100049, P. R. China.*

<sup>c</sup>*Synfuels China Technology, Co. Ltd. Beijing 101400, P. R. China.*

\* Corresponding authors.

E-mail addresses: [pjiang@nanoctr.cn](mailto:pjiang@nanoctr.cn) (P. Jiang), [liangmh@nanoctr.cn](mailto:liangmh@nanoctr.cn) (M. Liang)

## KEYWORDS

Ni(OH)<sub>2</sub>; Asymmetric Supercapacitors; Electrochemical energy; Intercalates; Iron  
oxides; Specific capacitance

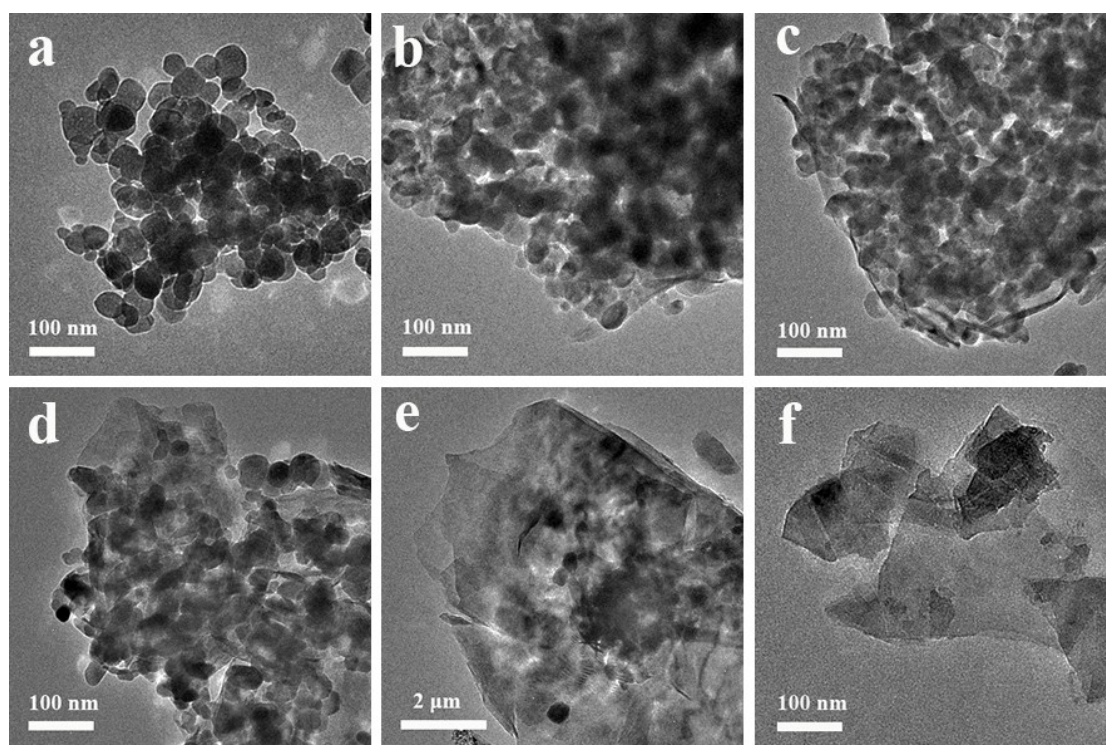

Figure S1. The TEM images of (a)  $\text{Fe}_2\text{O}_3$  and (b) 5-NF, (c) 10-NF, (d) 20-NF, (e) 50-NF, and (f)  $\text{Ni}(\text{OH})_2$ .

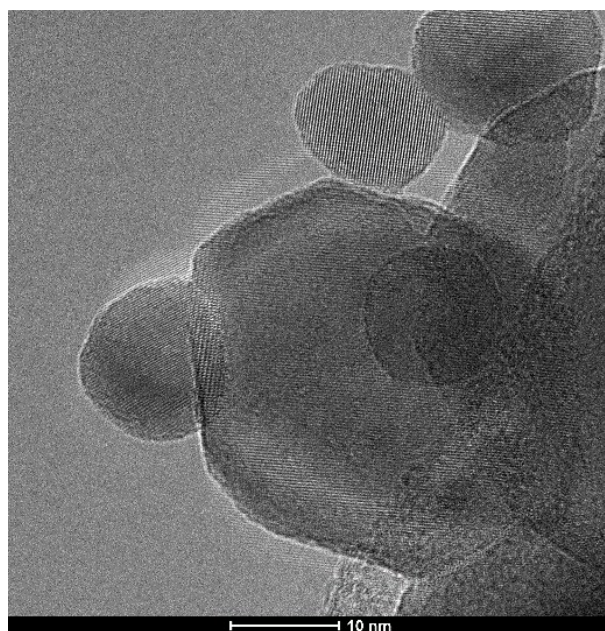

Figure S2. The HRTEM image of 10-NF.

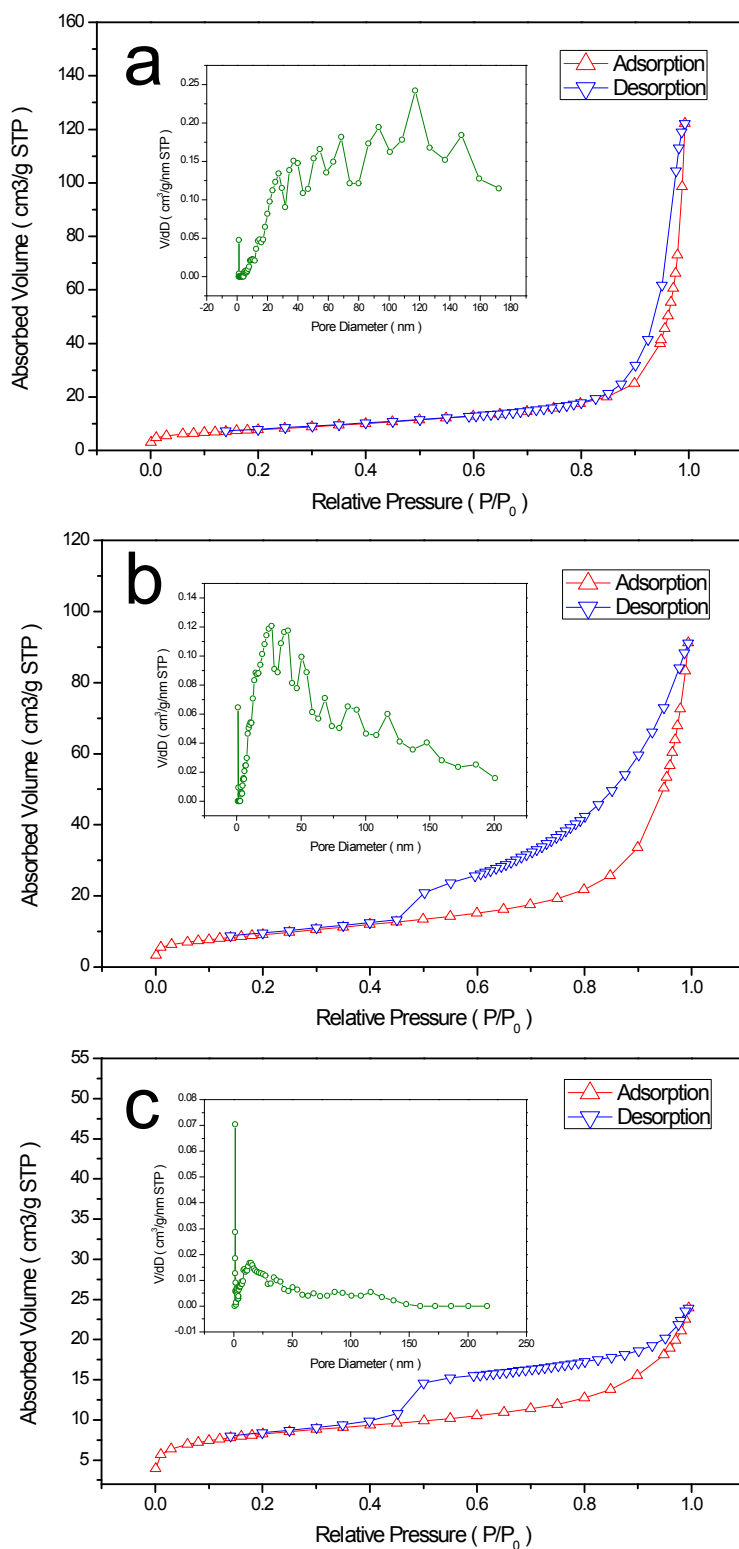

Figure S3.  $N_2$  absorption and desorption isotherm plots of (a)  $\alpha\text{-Fe}_2\text{O}_3$ , (b) 50-NF, and (c)  $\text{Ni(OH)}_2$ , the insets are the pore size distribution patterns for the corresponding samples.

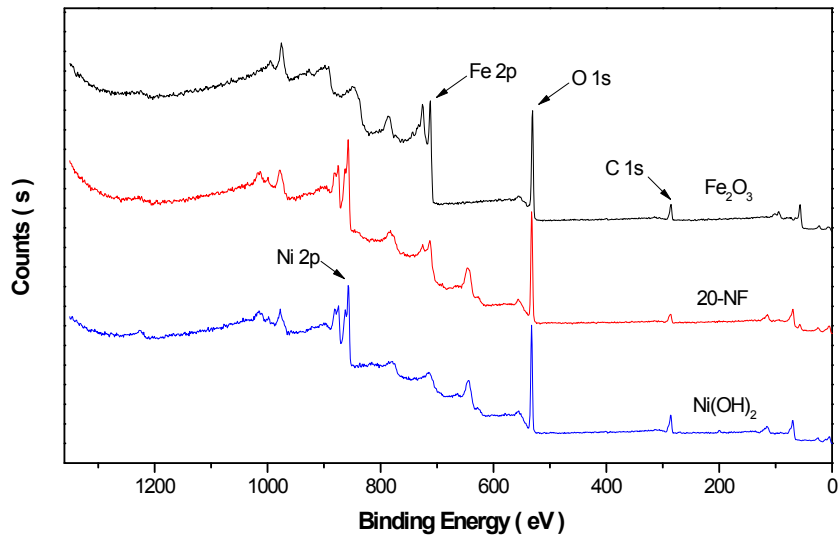

Figure S4. XPS survey spectra of  $\text{Fe}_2\text{O}_3$ , 20-NF,  $\text{Ni}(\text{OH})_2$

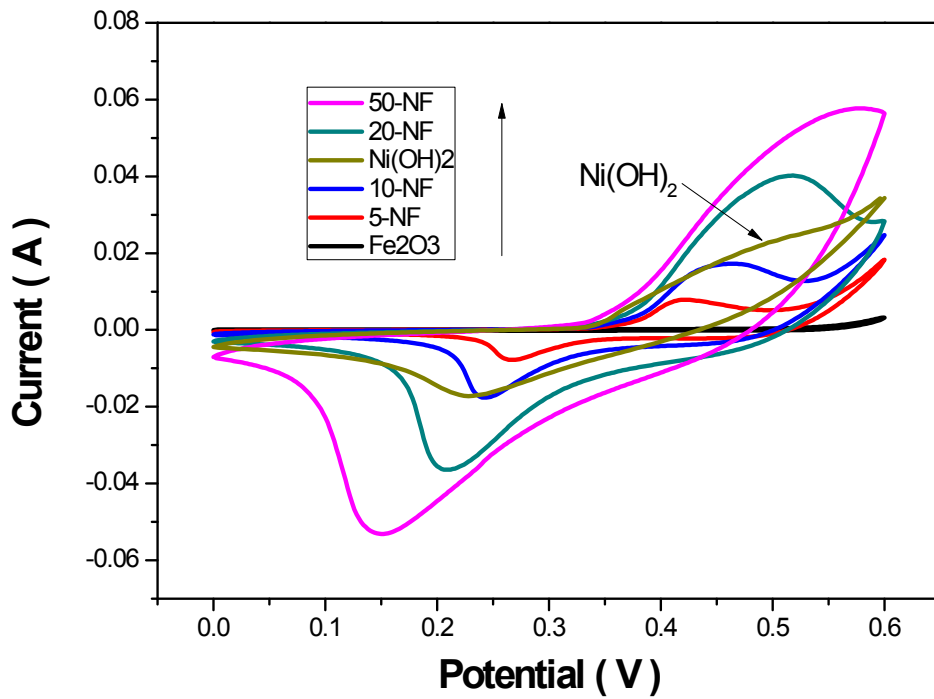

Figure S5. CV curves of  $\alpha\text{-Fe}_2\text{O}_3$ , 5-NF, 10-NF, 20-NF, 50-NF and  $\text{Ni}(\text{OH})_2$  at the scan rate was  $20 \text{ mV s}^{-1}$ ;

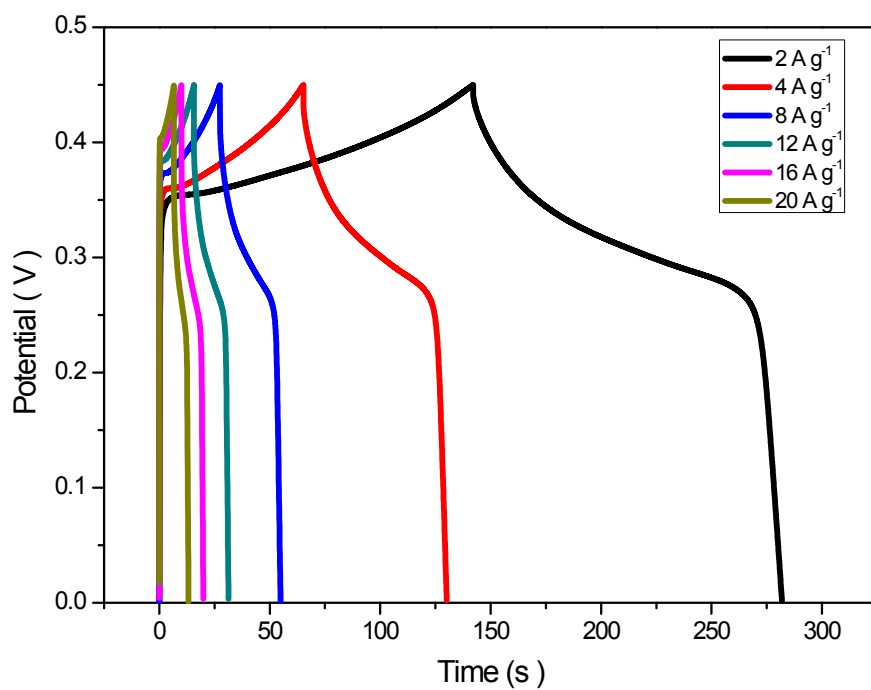

Figure S6. The GCD curves of 50-NF at different current density

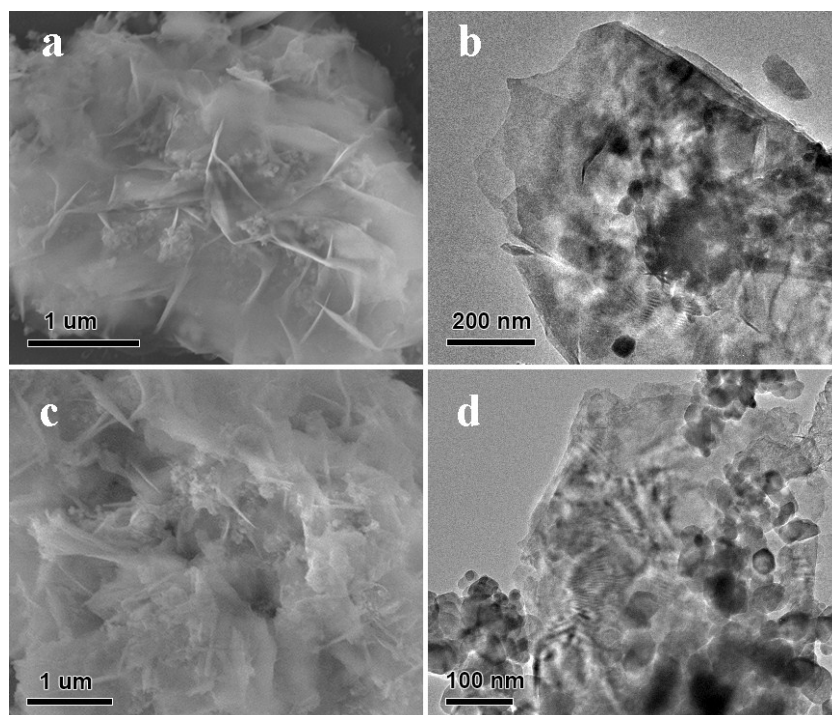

Figure S7. The SEM images of 50-NF (a) and (b) The TEM images of 50-NF, (c) The SEM images of 50-NF after 5000 charge/discharge cycle, (d) The TEM images of 50-NF after 5000 charge/discharge cycle

Table S1. Comparison of electrochemical performance with other electrodes materials comprised of Fe<sub>2</sub>O<sub>3</sub>- Ni(OH)<sub>2</sub>.

| Sample                                                            | Experiment method                     | Electrochemical test                                                       | Electrochemical performance                                                                                | Capacitance retention (cycle numbers) | Ref.         |
|-------------------------------------------------------------------|---------------------------------------|----------------------------------------------------------------------------|------------------------------------------------------------------------------------------------------------|---------------------------------------|--------------|
| $\alpha$ -Fe <sub>2</sub> O <sub>3</sub> @Ni(OH) <sub>2</sub>     | hydrothermal<br>80°C                  | CV:0-0.6V ;<br>GCD: 0-0.6V                                                 | 356 F/g (16 A/g)                                                                                           | 93.3% (500)                           | S1           |
| NiO// $\alpha$ -Fe <sub>2</sub> O <sub>3</sub>                    | hydrothermal<br>120°C                 | Fe <sub>2</sub> O <sub>3</sub> :-0.8-0V;<br>NiO:0-0.8V;<br>ASC: 0 - 1.25 V | 1.3 F/cm <sup>2</sup> (4 mA/cm <sup>2</sup> );<br>ASCs: energy densities<br>12.4 Wh /kg, power 951<br>W/kg | 85% (10,000)                          | S2           |
| $\alpha$ -Fe <sub>2</sub> O <sub>3</sub> @NiO                     | hydrothermal<br>120°C                 | CV:-0.2-<br>0.8V;GCD :-0.2-<br>0.8 V                                       | 557 mF/cm <sup>2</sup> (1mA/cm <sup>2</sup> )                                                              | 96.2% (3000)                          | S3           |
| Ni(OH) <sub>2</sub> -<br>Fe <sub>2</sub> O <sub>3</sub>           | solvothermal<br>140°C                 | CV:0-0.45V;<br>GCD: 0-0.4V                                                 | 1745.33 F/g (2 A /g)                                                                                       | 84.28% (3000)                         | S4           |
| Ni(OH) <sub>2</sub> -<br>Fe <sub>2</sub> O <sub>3</sub>           | hrdrothermal<br>85°C                  | CV:0-0.6V;<br>GCD: 0-0.6V                                                  | 390 F/g (54.6 A/g)                                                                                         | 85.7%(5000)                           | S5           |
| Ni(OH) <sub>2</sub> -<br>$\alpha$ -Fe <sub>2</sub> O <sub>3</sub> | evaporation<br>solvent<br>method 60°C | CV:0-0.6V;<br>GCD: 0-0.45V;<br>ASCs : -1-1.4V                              | 1107 F/g (20 mV/s);<br>ASCs:energy densities<br>31.6 Wh /kg, power 474<br>W/kg                             | ASCs:89.6%(<br>5000)                  | This<br>work |

- S1 H. Jiang, H. Ma, Y. Jin, L. Wang, F. Gao and Q. Lu, *Scientific Reports*, 2016, **6**.
- S2 S. Zhang, B. Yin, Z. Wang and F. Peter, *Chemical Engineering Journal*, 2016, **306**, 193-203.
- S3 Y. Jiao, Y. Liu, B. Yin, S. Zhang, F. Qu and X. Wu, *Nano Energy*, 2014, **10**, 90-98.
- S4 Z. Li, W. Zhang, Y. Su, Z. Li and J. Groeper, *Nanotechnology*, 2017, **28**, 045603.
- S5 W. Tian, X. Wang, C. Zhi, T. Zhai, D. Liu, C. Zhang, D. Golberg and Y. Bando, *Nano Energy*, 2013, **2**, 754-763.
